# Supplementary material for: Molecular Characterization of a New Ecotype of Holoparasitic Plant Orobanche L. on Host Weed Xanthium spinosum L.
Source: MDPI journal article supplement (doi:10.3390/plants11111406), 2022-05-25
Supplement: s1 [file s1]

Table S2. Maximum likelihood fits of 24 different models of nucleotide substitution.

| Model    | BIC     | AICc    | lnL      | Invariant | Gamma | R    |
|----------|---------|---------|----------|-----------|-------|------|
| K2+G     | 5929.17 | 5453.95 | -2665.76 | n/a       | 0.84  | 1.89 |
| K2+I     | 5931.11 | 5455.89 | -2666.73 | 0.4       | n/a   | 1.87 |
| K2+G+I   | 5938.64 | 5455.64 | -2665.6  | 0.24      | 2     | 1.88 |
| T92+G    | 5941.67 | 5458.66 | -2667.11 | n/a       | 0.83  | 1.91 |
| T92+I    | 5942.4  | 5459.4  | -2667.48 | 0.41      | n/a   | 1.89 |
| T92+G+I  | 5950.71 | 5459.92 | -2666.74 | 0.3       | 2.93  | 1.9  |
| TN93+I   | 5951.86 | 5445.51 | -2657.52 | 0.4       | n/a   | 1.94 |
| HKY+I    | 5954.17 | 5455.6  | -2663.57 | 0.41      | n/a   | 1.9  |
| GTR+I    | 5962.66 | 5432.96 | -2648.22 | 0.41      | n/a   | 1.85 |
| GTR+G    | 5969.92 | 5440.22 | -2651.85 | n/a       | 0.86  | 1.64 |
| K2       | 5972.2  | 5504.76 | -2692.18 | n/a       | n/a   | 1.77 |
| TN93+G   | 5977.27 | 5470.91 | -2670.22 | n/a       | 0.84  | 1.95 |
| GTR+G+I  | 5977.91 | 5440.42 | -2650.94 | 0.34      | 5.33  | 1.62 |
| HKY+G    | 5978.88 | 5480.31 | -2675.92 | n/a       | 0.83  | 1.91 |
| T92      | 5985.46 | 5510.24 | -2693.91 | n/a       | n/a   | 1.77 |
| TN93+G+I | 5986.26 | 5472.12 | -2669.81 | 0.3       | 3.16  | 1.94 |
| HKY+G+I  | 5987.98 | 5481.63 | -2675.57 | 0.31      | 3.19  | 1.91 |
| TN93     | 5994.6  | 5496.03 | -2683.78 | n/a       | n/a   | 1.8  |
| HKY      | 5997.34 | 5506.56 | -2690.05 | n/a       | n/a   | 1.79 |
| GTR      | 6009.47 | 5487.55 | -2676.52 | n/a       | n/a   | 1.77 |
| JC+G     | 6057.91 | 5590.47 | -2735.03 | n/a       | 0.91  | 0.5  |
| JC+I     | 6059.71 | 5592.27 | -2735.93 | 0.39      | n/a   | 0.5  |
| JC+G+I   | 6067.37 | 5592.15 | -2734.86 | 0.23      | 2.12  | 0.5  |
| JC       | 6096.12 | 5636.47 | -2759.04 | n/a       | n/a   | 0.5  |

GTR: General Time Reversible; HKY: Hasegawa-Kishino-Yano; TN93: Tamura-Nei; T92: Tamura 3-parameter; K2: Kimura 2-parameter; JC: Jukes-Cantor; R: estimated transition/transversion bias.
