# Supplementary material for: Molecular Characterization of a New Ecotype of Holoparasitic Plant Orobanche L. on Host Weed Xanthium spinosum L.
Source: MDPI journal article supplement (doi:10.3390/plants11111406), 2022-05-25
Supplement: s1 [file s1]

Table S1. Estimates of evolutionary divergence between sequences

|    | 1     | 2     | 3     | 4     | 5     | 6     | 7     | 8     | 9     | 10    | 11    | 12    | 13    | 14    | 15    | 16    | 17    | 18    | 19    | 20    | 21    | 22    | 23    | 24    | 25    | 26    | 27    | 28    | 29    | 30    |
|----|-------|-------|-------|-------|-------|-------|-------|-------|-------|-------|-------|-------|-------|-------|-------|-------|-------|-------|-------|-------|-------|-------|-------|-------|-------|-------|-------|-------|-------|-------|
| 2  | 0.058 |       |       |       |       |       |       |       |       |       |       |       |       |       |       |       |       |       |       |       |       |       |       |       |       |       |       |       |       |       |
| 3  | 0.058 | 0.000 |       |       |       |       |       |       |       |       |       |       |       |       |       |       |       |       |       |       |       |       |       |       |       |       |       |       |       |       |
| 4  | 0.060 | 0.002 | 0.002 |       |       |       |       |       |       |       |       |       |       |       |       |       |       |       |       |       |       |       |       |       |       |       |       |       |       |       |
| 5  | 0.060 | 0.002 | 0.002 | 0.003 |       |       |       |       |       |       |       |       |       |       |       |       |       |       |       |       |       |       |       |       |       |       |       |       |       |       |
| 6  | 0.056 | 0.002 | 0.002 | 0.003 | 0.003 |       |       |       |       |       |       |       |       |       |       |       |       |       |       |       |       |       |       |       |       |       |       |       |       |       |
| 7  | 0.062 | 0.003 | 0.003 | 0.005 | 0.005 | 0.005 |       |       |       |       |       |       |       |       |       |       |       |       |       |       |       |       |       |       |       |       |       |       |       |       |
| 8  | 0.062 | 0.003 | 0.003 | 0.005 | 0.005 | 0.005 | 0.007 |       |       |       |       |       |       |       |       |       |       |       |       |       |       |       |       |       |       |       |       |       |       |       |
| 9  | 0.062 | 0.003 | 0.002 | 0.005 | 0.005 | 0.005 | 0.007 | 0.007 |       |       |       |       |       |       |       |       |       |       |       |       |       |       |       |       |       |       |       |       |       |       |
| 10 | 0.058 | 0.003 | 0.003 | 0.005 | 0.005 | 0.005 | 0.007 | 0.007 | 0.007 |       |       |       |       |       |       |       |       |       |       |       |       |       |       |       |       |       |       |       |       |       |
| 11 | 0.060 | 0.002 | 0.002 | 0.003 | 0.003 | 0.003 | 0.005 | 0.005 | 0.005 | 0.005 |       |       |       |       |       |       |       |       |       |       |       |       |       |       |       |       |       |       |       |       |
| 12 | 0.060 | 0.002 | 0.002 | 0.003 | 0.003 | 0.003 | 0.005 | 0.005 | 0.005 | 0.005 | 0.003 |       |       |       |       |       |       |       |       |       |       |       |       |       |       |       |       |       |       |       |
| 13 | 0.060 | 0.002 | 0.002 | 0.003 | 0.003 | 0.003 | 0.005 | 0.005 | 0.005 | 0.005 | 0.003 | 0.003 |       |       |       |       |       |       |       |       |       |       |       |       |       |       |       |       |       |       |
| 14 | 0.060 | 0.002 | 0.002 | 0.003 | 0.003 | 0.003 | 0.005 | 0.005 | 0.005 | 0.005 | 0.003 | 0.003 | 0.003 |       |       |       |       |       |       |       |       |       |       |       |       |       |       |       |       |       |
| 15 | 0.060 | 0.002 | 0.002 | 0.003 | 0.003 | 0.003 | 0.005 | 0.005 | 0.005 | 0.005 | 0.003 | 0.003 | 0.003 | 0.003 |       |       |       |       |       |       |       |       |       |       |       |       |       |       |       |       |
| 16 | 0.066 | 0.009 | 0.007 | 0.011 | 0.011 | 0.011 | 0.012 | 0.012 | 0.009 | 0.012 | 0.011 | 0.011 | 0.010 | 0.011 | 0.011 |       |       |       |       |       |       |       |       |       |       |       |       |       |       |       |
| 17 | 0.062 | 0.003 | 0.003 | 0.005 | 0.005 | 0.005 | 0.007 | 0.007 | 0.007 | 0.007 | 0.005 | 0.005 | 0.005 | 0.005 | 0.005 | 0.012 |       |       |       |       |       |       |       |       |       |       |       |       |       |       |
| 18 | 0.068 | 0.009 | 0.007 | 0.011 | 0.011 | 0.011 | 0.012 | 0.012 | 0.009 | 0.012 | 0.011 | 0.011 | 0.010 | 0.011 | 0.011 | 0.014 | 0.012 |       |       |       |       |       |       |       |       |       |       |       |       |       |
| 19 | 0.060 | 0.003 | 0.003 | 0.005 | 0.005 | 0.005 | 0.007 | 0.007 | 0.007 | 0.007 | 0.005 | 0.005 | 0.005 | 0.005 | 0.005 | 0.010 | 0.007 | 0.012 |       |       |       |       |       |       |       |       |       |       |       |       |
| 20 | 0.068 | 0.010 | 0.009 | 0.012 | 0.012 | 0.012 | 0.014 | 0.014 | 0.010 | 0.014 | 0.012 | 0.012 | 0.012 | 0.012 | 0.012 | 0.016 | 0.014 | 0.016 | 0.014 |       |       |       |       |       |       |       |       |       |       |       |
| 21 | 0.364 | 0.271 | 0.272 | 0.275 | 0.268 | 0.275 | 0.278 | 0.271 | 0.278 | 0.278 | 0.268 | 0.275 | 0.274 | 0.275 | 0.268 | 0.274 | 0.275 | 0.285 | 0.274 | 0.286 |       |       |       |       |       |       |       |       |       |       |
| 22 | 0.365 | 0.288 | 0.284 | 0.292 | 0.284 | 0.292 | 0.288 | 0.296 | 0.287 | 0.295 | 0.292 | 0.292 | 0.291 | 0.292 | 0.284 | 0.283 | 0.292 | 0.295 | 0.290 | 0.296 | 0.196 |       |       |       |       |       |       |       |       |       |
| 23 | 0.348 | 0.262 | 0.259 | 0.266 | 0.258 | 0.266 | 0.262 | 0.269 | 0.261 | 0.269 | 0.266 | 0.266 | 0.265 | 0.266 | 0.258 | 0.258 | 0.266 | 0.269 | 0.264 | 0.269 | 0.163 | 0.044 |       |       |       |       |       |       |       |       |
| 24 | 0.329 | 0.252 | 0.253 | 0.256 | 0.256 | 0.256 | 0.252 | 0.259 | 0.259 | 0.259 | 0.256 | 0.256 | 0.255 | 0.256 | 0.249 | 0.255 | 0.256 | 0.266 | 0.254 | 0.267 | 0.183 | 0.088 | 0.062 |       |       |       |       |       |       |       |
| 25 | 0.413 | 0.320 | 0.316 | 0.324 | 0.315 | 0.324 | 0.324 | 0.328 | 0.319 | 0.327 | 0.324 | 0.324 | 0.323 | 0.324 | 0.315 | 0.314 | 0.324 | 0.319 | 0.322 | 0.328 | 0.225 | 0.173 | 0.172 | 0.201 |       |       |       |       |       |       |
| 26 | 0.068 | 0.009 | 0.007 | 0.010 | 0.010 | 0.010 | 0.012 | 0.012 | 0.009 | 0.012 | 0.010 | 0.010 | 0.010 | 0.010 | 0.010 | 0.014 | 0.012 | 0.014 | 0.012 | 0.012 | 0.275 | 0.284 | 0.266 | 0.263 | 0.324 |       |       |       |       |       |
| 27 | 0.338 | 0.254 | 0.251 | 0.258 | 0.250 | 0.258 | 0.254 | 0.261 | 0.253 | 0.260 | 0.258 | 0.258 | 0.257 | 0.258 | 0.250 | 0.250 | 0.258 | 0.260 | 0.256 | 0.261 | 0.183 | 0.046 | 0.027 | 0.069 | 0.172 | 0.258 |       |       |       |       |
| 28 | 0.298 | 0.226 | 0.226 | 0.229 | 0.229 | 0.229 | 0.226 | 0.233 | 0.232 | 0.232 | 0.229 | 0.229 | 0.229 | 0.229 | 0.223 | 0.229 | 0.229 | 0.239 | 0.228 | 0.239 | 0.151 | 0.056 | 0.042 | 0.073 | 0.164 | 0.236 | 0.046 |       |       |       |
| 29 | 0.124 | 0.058 | 0.056 | 0.060 | 0.060 | 0.060 | 0.062 | 0.062 | 0.058 | 0.062 | 0.060 | 0.060 | 0.060 | 0.060 | 0.060 | 0.064 | 0.060 | 0.064 | 0.058 | 0.062 | 0.259 | 0.290 | 0.259 | 0.264 | 0.298 | 0.058 | 0.255 | 0.247 |       |       |
| 30 | 0.355 | 0.268 | 0.265 | 0.271 | 0.264 | 0.271 | 0.268 | 0.275 | 0.267 | 0.274 | 0.271 | 0.271 | 0.271 | 0.271 | 0.264 | 0.263 | 0.271 | 0.274 | 0.270 | 0.275 | 0.173 | 0.040 | 0.018 | 0.058 | 0.161 | 0.271 | 0.027 | 0.042 | 0.261 |       |
| 31 | 0.368 | 0.291 | 0.288 | 0.295 | 0.287 | 0.295 | 0.291 | 0.299 | 0.290 | 0.298 | 0.295 | 0.295 | 0.294 | 0.295 | 0.287 | 0.286 | 0.295 | 0.298 | 0.293 | 0.299 | 0.193 | 0.005 | 0.042 | 0.086 | 0.170 | 0.287 | 0.044 | 0.054 | 0.285 | 0.038 |

The number of base substitutions per site from between sequences are shown. Analyses were conducted using the Kimura 2-parameter model. The rate variation among sites was modeled with a gamma distribution (shape parameter = 0.88). The analysis involved 31 nucleotide sequences. All positions with less than 95% site coverage were eliminated. That is, fewer than 5% alignment gaps, missing data, and ambiguous bases were allowed at any position. There were a total of 581 positions in the final dataset.
