# Supplementary material for: Molecular Characterization of a New Ecotype of Holoparasitic Plant Orobanche L. on Host Weed Xanthium spinosum L.
Source: MDPI journal article supplement (doi:10.3390/plants11111406), 2022-05-25
Supplement: s1 [file s1]

Table S3. Test of the homogeneity of substitution patterns between sequences. Numbers are the same as in Table 1.

|    | 1     | 2     | 3     | 4     | 5     | 6     | 7     | 8     | 9     | 10    | 11    | 12    | 13    | 14    | 15    | 16    | 17    | 18    | 19    | 20    | 21    | 22    | 23    | 24    | 25    | 26    | 27    | 28    | 29    | 30    |
|----|-------|-------|-------|-------|-------|-------|-------|-------|-------|-------|-------|-------|-------|-------|-------|-------|-------|-------|-------|-------|-------|-------|-------|-------|-------|-------|-------|-------|-------|-------|
| 2  | 0.000 |       |       |       |       |       |       |       |       |       |       |       |       |       |       |       |       |       |       |       |       |       |       |       |       |       |       |       |       |       |
| 3  | 0.000 | 1.000 |       |       |       |       |       |       |       |       |       |       |       |       |       |       |       |       |       |       |       |       |       |       |       |       |       |       |       |       |
| 4  | 0.000 | 1.000 | 1.000 |       |       |       |       |       |       |       |       |       |       |       |       |       |       |       |       |       |       |       |       |       |       |       |       |       |       |       |
| 5  | 0.000 | 1.000 | 1.000 | 1.000 |       |       |       |       |       |       |       |       |       |       |       |       |       |       |       |       |       |       |       |       |       |       |       |       |       |       |
| 6  | 0.000 | 1.000 | 1.000 | 1.000 | 1.000 |       |       |       |       |       |       |       |       |       |       |       |       |       |       |       |       |       |       |       |       |       |       |       |       |       |
| 7  | 0.000 | 0.072 | 0.072 | 1.000 | 0.264 | 1.000 |       |       |       |       |       |       |       |       |       |       |       |       |       |       |       |       |       |       |       |       |       |       |       |       |
| 8  | 0.000 | 1.000 | 1.000 | 1.000 | 1.000 | 1.000 | 1.000 |       |       |       |       |       |       |       |       |       |       |       |       |       |       |       |       |       |       |       |       |       |       |       |
| 9  | 0.000 | 1.000 | 1.000 | 1.000 | 1.000 | 1.000 | 1.000 | 1.000 |       |       |       |       |       |       |       |       |       |       |       |       |       |       |       |       |       |       |       |       |       |       |
| 10 | 0.000 | 1.000 | 1.000 | 1.000 | 1.000 | 1.000 | 1.000 | 1.000 | 1.000 |       |       |       |       |       |       |       |       |       |       |       |       |       |       |       |       |       |       |       |       |       |
| 11 | 0.000 | 1.000 | 1.000 | 1.000 | 0.092 | 1.000 | 0.292 | 0.284 | 1.000 | 1.000 |       |       |       |       |       |       |       |       |       |       |       |       |       |       |       |       |       |       |       |       |
| 12 | 0.000 | 1.000 | 1.000 | 1.000 | 0.112 | 1.000 | 0.244 | 0.224 | 1.000 | 1.000 | 1.000 |       |       |       |       |       |       |       |       |       |       |       |       |       |       |       |       |       |       |       |
| 13 | 0.000 | 1.000 | 1.000 | 0.432 | 0.438 | 0.434 | 0.100 | 0.244 | 0.312 | 1.000 | 1.000 | 1.000 |       |       |       |       |       |       |       |       |       |       |       |       |       |       |       |       |       |       |
| 14 | 0.000 | 1.000 | 1.000 | 1.000 | 1.000 | 1.000 | 0.238 | 1.000 | 1.000 | 1.000 | 0.090 | 0.094 | 0.418 |       |       |       |       |       |       |       |       |       |       |       |       |       |       |       |       |       |
| 15 | 0.000 | 1.000 | 1.000 | 1.000 | 0.080 | 1.000 | 0.236 | 0.224 | 1.000 | 1.000 | 1.000 | 1.000 | 1.000 | 0.054 |       |       |       |       |       |       |       |       |       |       |       |       |       |       |       |       |
| 16 | 0.000 | 1.000 | 1.000 | 1.000 | 1.000 | 1.000 | 0.330 | 1.000 | 1.000 | 1.000 | 0.416 | 0.378 | 1.000 | 1.000 | 0.420 |       |       |       |       |       |       |       |       |       |       |       |       |       |       |       |
| 17 | 0.000 | 1.000 | 1.000 | 0.236 | 0.268 | 0.240 | 0.058 | 0.112 | 0.352 | 1.000 | 1.000 | 1.000 | 1.000 | 0.288 | 1.000 | 1.000 |       |       |       |       |       |       |       |       |       |       |       |       |       |       |
| 18 | 0.000 | 0.338 | 0.092 | 1.000 | 0.250 | 1.000 | 1.000 | 1.000 | 0.274 | 1.000 | 0.438 | 0.450 | 0.250 | 0.224 | 0.404 | 0.146 | 0.164 |       |       |       |       |       |       |       |       |       |       |       |       |       |
| 19 | 0.000 | 0.102 | 0.082 | 0.094 | 1.000 | 0.086 | 0.012 | 0.282 | 1.000 | 0.362 | 0.108 | 0.110 | 0.108 | 1.000 | 0.088 | 1.000 | 0.206 | 0.048 |       |       |       |       |       |       |       |       |       |       |       |       |
| 20 | 0.000 | 1.000 | 0.308 | 1.000 | 1.000 | 1.000 | 0.224 | 0.312 | 0.296 | 1.000 | 1.000 | 1.000 | 1.000 | 1.000 | 1.000 | 0.302 | 1.000 | 0.238 | 0.232 |       |       |       |       |       |       |       |       |       |       |       |
| 21 | 0.000 | 0.000 | 0.002 | 0.002 | 0.014 | 0.002 | 0.000 | 0.004 | 0.006 | 0.008 | 0.000 | 0.002 | 0.010 | 0.006 | 0.002 | 0.012 | 0.004 | 0.000 | 0.014 | 0.000 |       |       |       |       |       |       |       |       |       |       |
| 22 | 0.000 | 0.078 | 0.088 | 0.044 | 0.078 | 0.028 | 0.032 | 0.048 | 0.040 | 0.046 | 0.070 | 0.068 | 0.068 | 0.054 | 0.056 | 0.084 | 0.114 | 0.034 | 0.084 | 0.120 | 0.266 |       |       |       |       |       |       |       |       |       |
| 23 | 0.000 | 0.198 | 0.186 | 0.174 | 0.208 | 0.178 | 0.120 | 0.148 | 0.186 | 0.158 | 0.176 | 0.174 | 0.262 | 0.196 | 0.212 | 0.194 | 0.232 | 0.086 | 0.212 | 0.266 | 0.316 | 0.266 |       |       |       |       |       |       |       |       |
| 24 | 0.004 | 1.000 | 1.000 | 0.344 | 1.000 | 0.322 | 0.260 | 0.338 | 0.354 | 0.404 | 1.000 | 1.000 | 1.000 | 1.000 | 1.000 | 1.000 | 1.000 | 0.278 | 1.000 | 1.000 | 0.036 | 0.368 | 1.000 |       |       |       |       |       |       |       |
| 25 | 0.008 | 1.000 | 1.000 | 1.000 | 1.000 | 1.000 | 0.350 | 1.000 | 1.000 | 1.000 | 1.000 | 1.000 | 1.000 | 1.000 | 1.000 | 1.000 | 1.000 | 0.362 | 1.000 | 1.000 | 0.094 | 0.346 | 1.000 | 1.000 |       |       |       |       |       |       |
| 26 | 0.000 | 1.000 | 0.238 | 1.000 | 1.000 | 1.000 | 1.000 | 1.000 | 0.300 | 1.000 | 1.000 | 1.000 | 1.000 | 1.000 | 1.000 | 0.230 | 1.000 | 1.000 | 0.202 | 1.000 | 0.004 | 0.058 | 0.176 | 1.000 | 1.000 |       |       |       |       |       |
| 27 | 0.000 | 0.174 | 0.184 | 0.140 | 0.218 | 0.152 | 0.098 | 0.138 | 0.114 | 0.144 | 0.166 | 0.156 | 0.220 | 0.210 | 0.172 | 0.222 | 0.190 | 0.112 | 0.212 | 0.254 | 0.334 | 0.102 | 1.000 | 1.000 | 1.000 | 0.184 |       |       |       |       |
| 28 | 0.000 | 0.176 | 0.182 | 0.110 | 0.190 | 0.156 | 0.082 | 0.152 | 0.144 | 0.160 | 0.174 | 0.144 | 0.184 | 0.154 | 0.170 | 0.214 | 0.230 | 0.074 | 0.202 | 0.262 | 0.230 | 0.350 | 1.000 | 1.000 | 1.000 | 0.210 | 1.000 |       |       |       |
| 29 | 0.000 | 1.000 | 1.000 | 1.000 | 1.000 | 1.000 | 1.000 | 1.000 | 1.000 | 1.000 | 1.000 | 1.000 | 1.000 | 1.000 | 1.000 | 1.000 | 1.000 | 1.000 | 1.000 | 1.000 | 0.006 | 0.146 | 0.318 | 1.000 | 1.000 | 1.000 | 0.310 | 0.368 |       |       |
| 30 | 0.000 | 0.196 | 0.206 | 0.168 | 0.200 | 0.146 | 0.088 | 0.162 | 0.164 | 0.168 | 0.170 | 0.178 | 0.212 | 0.192 | 0.184 | 0.256 | 0.208 | 0.116 | 0.252 | 0.234 | 1.000 | 0.136 | 1.000 | 0.388 | 1.000 | 0.180 | 1.000 | 1.000 | 0.260 |       |
| 31 | 0.000 | 0.110 | 0.106 | 0.078 | 0.094 | 0.070 | 0.040 | 0.080 | 0.094 | 0.094 | 0.112 | 0.132 | 0.142 | 0.096 | 0.114 | 0.128 | 0.148 | 0.054 | 0.134 | 0.172 | 0.218 | 1.000 | 1.000 | 1.000 | 1.000 | 0.108 | 0.264 | 1.000 | 0.274 | 0.242 |

The probability of rejecting the null hypothesis that sequences have evolved with the same pattern of substitution, as judged from the extent of differences in base composition biases between sequences (Disparity Index test). A Monte Carlo test (500 replicates) was used to estimate the P-values, which are shown bottom the diagonal. P-values smaller than 0.05 are considered significant (marked with yellow highlights). The estimates of the disparity index per site are shown for each sequence pair below the diagonal. The analysis involved 31 nucleotide sequences.
